# Supplementary material for: Integrated analysis of motif activity and gene expression changes of transcription factors
Source: HighWire-hosted journal article supplement (doi:10.1101/gr.227231.117), 2017-12-12
Supplement: Supplemental_Table_S1.xlsx [file Supplemental_Table_S1.xlsx]

## Sheet: TableS1
Supplemental Table S1		Control		HSF1				MYBL1				MAZ				SATB1				TSHZ1
		Induced	Repressed	Higher		Lower		Higher		Lower		Higher		Lower		Higher		Lower		Higher		Lower
Pathway name	Pathway ID	P-value	Pvalue	P-value	Enrichment	P-value	Enrichment	P-value	Enrichment	P-value	Enrichment	P-value	Enrichment	P-value	Enrichment	P-value	Enrichment	P-value	Enrichment	P-value	Enrichment	P-value	Enrichment	Correlation to lipid accumulation
Metabolism of lipids	556833	5.81667e-14	0.999999	1.47176e-10	2.42907	0.995299	0.94801	0.0119282	1.76959	0.197378	1.14871	0.991447	1.48044	4.60862e-05	3.25778	0.665583	1.60069	1.57728e-28	4.36228	0.991677	1.21272	5.90242e-07	1.91	YES
The citric acid (TCA) cycle and respiratory electron transport	1428517	7.41204e-13	0.999999	8.78531e-06	1.73749	0.000715946	2.13333	0.0119282	1.51278	0.0155024	2.64714	0.991447	0.153724	3.52233e-07	2.13301	0.967766	0.794242	1.45138e-30	6.13189	0.991677	0.246329	1.58742e-07	2.8697	YES
Respiratory electron transport	611105	1.61931e-10	0.999999	0.0119425	1.41476	4.77327e-06	3.17246	0.178293	1.43389	0.00174855	3.77834	1	0.290894	0.000144269	1.53936	1	0.290894	6.61511e-15	4.33108	0.991677	0.466131	5.90242e-07	3.50306
Respiratory electron transport, ATP synthesis by chemiosmotic coupling, and heat production by uncoupling proteins.	163200	2.43591e-10	0.999999	6.47909e-05	1.63558	6.54781e-05	2.61558	0.0651909	1.29973	0.00537405	3.16582	1	0.219862	6.0379e-05	2.10709	1	0.219862	2.18729e-19	5.10567	0.991677	0.352308	5.90242e-07	3.23033	YES
Metabolism of water-soluble vitamins and cofactors	196849	6.54028e-07	0.999999	0.0117486	2.90319	0.995299	0.801628	0.879474	0.910114	0.929854	1.20627	0.437547	6.14306	0.0994143	1.22023	0.967766	2.15214	1.7791e-05	5.03447	0.991677	1.06403	0.000129129	2.26757
Metabolism of vitamins and cofactors	196854	6.54028e-07	0.999999	0.0117486	2.90319	0.995299	0.801628	0.879474	0.910114	0.929854	1.20627	0.437547	6.14306	0.0994143	1.22023	0.967766	2.15214	1.7791e-05	5.03447	0.991677	1.06403	0.000129129	2.26757
Sphingolipid metabolism	428157	6.50296e-06	0.999999	0.992632	1.1733	0.0429906	1.93072	0.221733	1.91692	0.197378	2.0429	0.912661	3.84293	0.775474	0.27806	0.681482	3.17452	0.000220618	4.14001	0.991677	2.12063	0.333269	1.75188
Triglyceride biosynthesis	75109	6.50296e-06	0.999999	1.93941e-08	6.72852	0.995299	0.484823	0.301904	2.38982	0.197378	2.19435	0.912661	6.7005	0.000332086	12.9695	0.967766	0.484823	2.14229e-09	10.5853	0.991677	0.776885	1.62914e-05	3.91113
Pyruvate metabolism and Citric Acid (TCA) cycle	71406	5.00583e-05	0.999999	0.011816	2.53987	0.995299	1.37484	0.0651909	2.72627	0.87348	1.76208	0.991447	0.461173	0.00161681	2.44046	0.967766	2.38273	2.50267e-14	8.14739	0.991677	0.738988	0.0696675	2.29446	YES
Glucose metabolism	70326	5.86565e-05	0.999999	0.284706	1.78451	0.123022	1.69339	0.982048	0.77855	0.133373	1.74421	0.991447	0.262612	0.0576551	3.64389	0.967766	0.809722	0.00332791	2.81579	0.991677	1.21181	0.000930868	2.46651
Metabolism of carbohydrates	71387	0.000118431	0.999999	0.867364	1.06672	2.0666e-08	2.09454	0.982048	0.831893	0.000436967	1.97402	0.991447	0.0768622	0.00598316	1.72626	0.967766	1.67816	2.06516e-05	2.74569	0.991677	1.14182	4.51971e-06	1.91015
Glycosphingolipid metabolism	1660662	0.000166134	0.999999	0.992632	1.13838	0.285551	1.72983	0.941933	1.47515	0.342042	2.2521	0.991447	0.497581	0.633686	0.497581	0.681482	2.57084	0.00577673	3.95301	0.991677	1.99632	0.749852	1.3767
Fatty acyl-CoA biosynthesis	75105	0.00017963	0.999999	4.50338e-05	7.27787	0.995299	0.900385	0.350071	2.66932	0.582761	2.17032	0.991447	12.4438	0.00918176	8.62901	1	0.900385	6.95843e-06	9.65413	0.991677	1.44279	0.00403156	4.47966
Arachidonic acid metabolism	2142753	0.00241106	0.999999	0.992632	0.722867	0.995299	1.52869	0.982048	0.871671	0.705843	1.37003	0.912661	0.439723	0.661469	0.439723	0.665583	5.93626	0.0264201	3.49336	0.991677	0.96951	0.284577	2.38196
Glycerophospholipid biosynthesis	1483206	0.00378995	0.999999	0.00180718	3.05097	0.782573	1.35471	0.688013	1.24197	0.562713	1.83984	0.991447	0.21009	0.00918176	6.5218	0.967766	0.21009	6.88772e-05	4.29517	0.991677	0.716331	0.0403722	2.1588
Gluconeogenesis	70263	0.00668738	0.999999	0.0830054	2.18093	0.995299	1.51624	0.982048	1.20909	0.743494	0.609938	0.991447	0.609938	0.493329	5.84546	0.834374	1.88064	0.043718	3.15135	0.991677	1.3448	0.0292879	2.7652
Biological oxidations	211859	0.00841891	0.999999	0.463187	1.25664	0.995299	1.13038	0.697799	1.45139	0.987052	0.606949	0.991447	1.85333	0.418367	1.28517	0.716424	1.81035	0.00143647	2.7416	0.991677	1.18428	0.984229	0.844877
Sulfur amino acid metabolism	1614635	0.00916711	0.999999	0.947164	1.35145	0.309627	2.85798	1	0.822091	0.87348	1.40184	0.912661	0.822091	0.126992	0.822091	0.755657	0.822091	0.000114738	5.38926	0.991677	0.822091	0.0270631	2.63766
Peroxisomal lipid metabolism	390918	0.0123352	0.999999	0.0271979	3.21947	0.842385	2.23825	0.453899	2.66932	0.856574	1.53535	0.991447	0.900385	0.846212	0.900385	1	0.900385	0.0314546	5.90253	0.991677	2.52759	0.369485	2.09348
Glycosaminoglycan metabolism	1630316	0.0124445	0.999999	0.992632	1.01139	9.75244e-10	3.01466	0.941933	0.971973	0.00153223	2.71534	0.792167	0.164418	0.0704091	1.57573	0.716424	2.90472	0.00932012	2.90472	0.787648	1.74917	0.00431076	2.05261
PPARA activates gene expression	1989781	0.0124445	0.999999	0.00318375	4.50859	0.995299	1.11913	0.311891	3.10359	0.996909	0.450193	0.991447	0.450193	0.661469	4.31451	0.716424	3.2639	4.21468e-08	8.57867	0.991677	1.53499	0.0759835	2.63752
Regulation of lipid metabolism by Peroxisome proliferator-activated receptor alpha (PPARalpha)	400206	0.0124445	0.999999	0.0120895	3.35894	0.995299	1.25164	0.879474	2.17251	0.653573	1.42633	0.991447	0.315135	0.68271	3.02016	0.665583	2.94126	1.20767e-05	6.00507	0.991677	1.26434	0.00752825	2.82062
Glycolysis	70171	0.0124445	0.999999	0.591328	1.60217	0.134559	2.78143	1	0.7003	0.38415	1.68803	1	0.7003	0.0826551	0.7003	0.681482	2.15926	0.425127	0.7003	1	0.7003	0.395384	1.93758
Sphingolipid de novo biosynthesis	1660661	0.0147645	0.999999	0.681282	1.84779	0.0972822	2.81545	0.0845485	3.10677	0.434113	2.40818	0.523408	8.71065	0.885349	0.63027	0.755657	4.56946	0.0143018	5.00714	0.991677	2.90835	0.181739	2.85737
HS-GAG degradation	2024096	0.0148979	0.999999	0.992632	1.48016	0.00206916	4.02208	0.982048	0.900385	0.0638731	4.7102	0.912661	0.900385	0.125507	0.900385	0.967766	2.77619	0.0098593	5.90253	0.991677	2.52759	0.0342508	4.08196
Phase I - Functionalization of compounds	211945	0.0238616	0.999999	0.61219	1.61541	0.995299	1.30318	0.879474	2.0684	0.987052	0.633011	0.912661	0.262612	0.334085	2.5168	0.665583	3.54527	0.0175088	3.91001	0.991677	1.68641	0.808597	1.19057
Phospholipid metabolism	1483257	0.0387486	0.999999	0.00364844	2.67618	0.995299	1.07927	0.221733	1.6059	0.482007	1.47906	0.912661	1.88	0.0206566	4.22275	0.755657	0.986213	0.00160098	3.15891	0.991677	1.20132	0.14997	1.63812
Bile acid and bile salt metabolism	194068	0.0387486	0.999999	0.357075	2.18093	0.995299	1.21414	0.982048	0.609938	0.964402	1.04008	0.991447	0.609938	0.885349	0.609938	0.967766	0.609938	0.1153	4.84562	0.991677	0.977371	0.872327	1.41816
Cobalamin (Cbl, vitamin B12) transport and metabolism	196741	0.0483881	0.999999	0.227523	2.77169	0.995299	1.41366	0.422779	1.87409	0.929854	2.27884	0.912661	0.945405	0.818718	0.945405	1	0.945405	0.081255	3.57153	0.991677	1.51493	0.333269	2.19815
Metabolism of amino acids and derivatives	71291	0.0483881	0.999999	0.0250209	1.40327	0.412193	1.50337	0.879474	1.19369	0.987052	0.885486	0.912661	3.99007	0.334085	1.40299	0.967766	0.943719	2.04647e-06	2.34806	0.837703	1.01478	0.492268	1.2623
Integration of energy metabolism	163685	0.0609791	0.999999	0.463187	2.15183	0.314637	1.59834	0.982048	1.05913	0.724816	1.42708	0.991447	0.214865	0.0175205	3.90353	0.665583	3.79594	0.000411136	4.09437	0.991677	1.25036	0.00787545	2.20787
Chondroitin sulfate/dermatan sulfate metabolism	1793185	0.0626679	0.999999	0.992632	1.15487	0.000689264	2.93029	0.964277	0.780872	0.00537405	4.2831	0.912661	0.393919	0.0508803	0.393919	0.967766	2.85591	0.00873126	4.77079	0.991677	1.81772	0.00865066	2.82981
Retinoid metabolism and transport	975634	0.076694	0.999999	0.463187	2.04575	0.148523	1.9256	0.982048	1.43732	0.336557	2.87817	0.991447	0.484823	0.00918176	6.72718	0.967766	0.484823	5.06083e-08	9.91193	0.991677	1.36101	0.0403722	2.84041
Heparan sulfate/heparin (HS-GAG) metabolism	1638091	0.133047	0.999999	0.992632	1.1313	0.000715946	2.67937	0.982048	0.764936	0.0155792	3.3793	0.912661	0.385879	0.224771	0.385879	0.755657	3.60154	0.055279	3.0656	0.991677	1.54817	0.0441885	2.77206
Keratan sulfate/keratin metabolism	1638074	0.14522	0.999999	0.992632	0.941918	0.00290331	2.84329	0.941933	2.2615	0.558748	1.78519	0.912661	0.572972	0.561835	5.49119	0.681482	4.15405	0.00798704	4.55195	0.533098	2.64396	0.395384	1.58529
Pyruvate metabolism	70268	0.14522	0.999999	0.0125481	3.98921	0.995299	1.88191	0.0651909	4.66016	0.929854	2.27884	0.991447	0.945405	0.0994143	0.945405	0.967766	2.915	4.38558e-06	8.82378	0.991677	0.945405	0.333269	2.61573
Regulation of insulin secretion	422356	0.155203	0.999999	0.536892	2.42312	0.347745	1.95476	0.941933	1.55478	0.856574	1.22731	0.991447	0.393919	0.0429014	3.77519	0.681482	4.49724	0.0462726	3.12946	0.991677	1.34312	0.137148	1.95985
Phase II - Conjugation of compounds	156580	0.179995	0.999999	0.480561	1.22745	0.995299	1.29944	0.594033	1.14814	0.987052	0.701181	0.991447	4.0203	0.901967	0.290894	0.967766	0.290894	0.0163192	1.90697	0.991677	0.991842	0.996809	0.676354
A tetrasaccharide linker sequence is required for GAG synthesis	1971475	0.223869	0.999999	0.992632	1.24333	0.168724	2.25474	0.982048	1.49927	0.0543167	4.48994	0.801804	0.756324	0.184601	0.756324	0.967766	2.332	0.006288	6.00857	0.991677	2.12317	0.0759835	3.42885
Synthesis of PA	1483166	0.28241	0.999999	0.0271979	4.15392	0.995299	1.00976	0.879474	2.00199	0.379511	3.05642	0.912661	0.675289	0.196607	12.2682	0.967766	0.675289	0.0279438	6.3027	1	0.675289	0.270867	2.46492
HS-GAG biosynthesis	2022928	0.309468	0.999999	0.992632	1.15123	0.000388199	3.12828	0.982048	0.7003	0.197378	3.66349	0.991447	0.7003	0.0328152	0.7003	0.755657	3.61822	0.081255	4.59085	0.991677	1.9659	0.368571	2.55622
Acyl chain remodelling of PC	1482788	0.420682	0.999999	0.750367	1.80244	1	0.787837	0.982048	0.787837	0.724816	2.45463	0.991447	0.787837	0.126063	7.55039	1	0.787837	0.0143018	5.16471	0.991677	0.787837	0.478361	2.17978
Glucagon-like Peptide-1 (GLP1) regulates insulin secretion	381676	0.420682	0.999999	0.144559	4.17997	0.995299	2.13651	0.86598	2.54798	0.856574	0.859459	0.991447	0.859459	0.334085	4.54812	0.967766	0.859459	0.116449	3.24684	0.991677	2.4127	0.369485	1.6187
Metabolism of nucleotides	15869	0.450794	0.11697	0.00961627	2.39697	0.995299	1.30625	0.355236	0.709565	0.330955	1.58966	0.0268996	6.37634	0.885349	1.26657	0.716424	1.73524	0.0266497	2.23387	0.481872	1.53699	0.346246	1.40223
Acyl chain remodelling of PE	1482839	0.505928	0.999999	0.382586	2.51971	1	0.859459	0.982048	0.859459	0.87348	2.67778	1	0.859459	0.0994143	8.23679	1	0.859459	0.032532	5.63423	0.991677	0.859459	0.401919	2.37794
Glutathione conjugation	156590	0.509189	0.999999	0.382586	1.97978	0.995299	1.00976	0.982048	0.675289	0.987052	1.15152	0.991447	9.33284	0.863741	0.675289	1	0.675289	0.000367417	4.42689	1	0.675289	0.845028	1.57011
Keratan sulfate biosynthesis	2022854	0.509189	0.999999	1	0.675289	0.02686	3.35103	0.879474	2.66534	0.850608	1.62774	0.912661	0.675289	0.482939	6.47176	0.681482	4.89585	0.0893632	3.48899	0.533098	3.11609	0.270867	1.86838
Cholesterol biosynthesis	191273	0.591951	0.857679	2.39931e-08	7.70373	0.995299	0.822091	0.0651909	4.85987	0.87348	1.9816	1	0.822091	0.000465292	7.87867	1	0.822091	1.66537e-08	11.0982	0.991677	1.81256	0.0270631	4.09012	YES
Activation of gene expression by SREBF (SREBP)	2426168	0.591951	0.999999	1.86472e-07	8.21967	0.995299	0.727234	0.221733	4.29911	0.87348	1.75295	1	0.727234	0.000332086	13.2119	1	0.727234	1.37102e-08	10.8277	0.991677	2.04151	0.00154497	4.58183
Regulation of cholesterol biosynthesis by SREBP (SREBF)	1655829	0.638217	0.857679	2.39956e-08	7.0407	0.995299	0.484823	0.0531422	5.24733	0.987052	1.16864	1	0.484823	0.00598316	8.80796	0.967766	0.484823	2.14229e-09	7.89184	0.787648	2.82132	0.0195901	3.2687	YES
Chondroitin sulfate biosynthesis	2022870	0.718527	0.999999	0.992632	2.16293	0.168724	3.75493	0.982048	0.945405	0.0543167	5.61242	0.912661	0.945405	0.300957	0.945405	0.967766	2.915	0.562443	2.25847	0.991677	2.08445	0.0270631	3.45089
Metabolism of steroid hormones	196071	0.753808	0.999999	0.8269	2.0531	0.995299	1.39401	1	0.7003	0.217327	2.18189	0.912661	0.7003	0.884762	3.70588	1	0.7003	0.425127	2.64558	1	0.7003	0.57718	1.93758
Cytochrome P450 - arranged by substrate type	211897	0.753808	0.999999	0.871424	1.25202	0.995299	1.04386	0.982048	1.03807	0.987052	0.844014	0.991447	0.35015	0.633686	1.85294	0.753635	2.53859	0.703153	1.32279	0.991677	0.772017	0.966237	1.12345
Inositol phosphate metabolism	1483249	0.823308	0.999999	0.823165	1.99912	0.995299	1.02181	0.7785	2.83371	0.912193	1.57055	0.912661	5.68086	0.554166	0.411045	0.716424	2.12373	0.78732	0.981942	0.787648	2.88722	0.561784	1.68195
Metabolism of nitric oxide	202131	0.823308	0.103797	0.686157	2.77169	0.0905346	2.35017	0.110077	2.80278	0.336557	2.94556	1	0.945405	0.554166	5.00294	0.967766	0.945405	0.00143647	4.88459	0.991677	2.65397	0.181739	3.45089
eNOS activation and regulation	203765	0.823308	0.103797	0.686157	2.77169	0.0905346	2.35017	0.110077	2.80278	0.336557	2.94556	1	0.945405	0.554166	5.00294	0.967766	0.945405	0.00143647	4.88459	0.991677	2.65397	0.181739	3.45089
Synthesis of PIPs at the plasma membrane	1660499	0.854378	0.999999	0.823165	2.04875	0.995299	1.42434	0.792214	2.82434	0.856574	1.38111	0.912661	7.91877	0.339545	0.572972	0.681482	4.15405	0.814376	1.36877	0.538386	2.98912	0.872327	1.58529
PI Metabolism	1483255	0.909778	0.999999	0.357075	2.5697	0.995299	0.940067	0.167623	2.97849	0.724816	1.17822	0.912661	5.22639	0.633686	0.378162	0.681482	2.74167	0.8244	1.42861	0.481872	2.65625	0.881991	1.04629
Synthesis of IP3 and IP4 in the cytosol	1855204	0.909778	0.999999	0.992632	1.60217	0.995299	1.04715	0.982048	2.76405	0.496832	2.67576	0.991447	0.7003	0.68271	0.7003	0.665583	3.61822	0.723418	1.67294	0.991677	2.80964	0.103957	2.86554
Glucagon signaling in metabolic regulation	163359	0.96429	0.999999	0.867364	1.31086	0.995299	1.14055	0.941933	2.2615	0.87348	1.38111	0.912661	0.572972	0.730842	3.03208	0.665583	2.96036	0.0190501	2.96036	0.991677	1.60846	0.270867	1.83837
Regulation of Glucokinase by Glucokinase Regulatory Protein	170822	0.979876	0.999999	0.0972524	1.49167	0.995299	0.652003	0.941933	1.93295	0.987052	0.652003	0.991447	0.652003	0	0.652003	1	0.652003	0.913351	0.652003	0.787648	1.04478	0.984229	0.93999
Hexose transport	189200	0.979876	0.999999	0.258777	1.31985	0.995299	0.896149	0.982048	1.33466	0.987052	0.450193	0.991447	0.450193	0.68271	0.450193	0.967766	1.38809	0.878286	1.07546	0.991677	0.721393	0.881991	1.24559
Glucose transport	70153	0.979876	0.999999	0.215175	1.38584	0.995299	0.940956	0.982048	1.40139	0.987052	0.472702	0.991447	0.472702	0.661469	0.472702	0.967766	1.4575	0.872756	1.12923	0.991677	0.757463	0.872327	1.30787
Regulation of ornithine decarboxylase (ODC)	350562	0.997357	0.103797	0.0836276	1.35218	0.117492	2.25118	0.221733	1.86406	0.987052	0.911535	0.991447	0.378162	0.863741	2.00117	1	0.378162	0.0076556	1.42861	0.153855	1.97282	0.992373	0.87926
